# Supplementary material for: Depletion of Liver Kupffer Cells Prevents the Development of Diet-Induced Hepatic Steatosis and Insulin Resistance
Source: PubMed Central journal article supplement — Diabetes. 2009 Nov 23;59(2):347–57. doi: 10.2337/db09-0016 (PMC2809951; doi:10.2337/db09-0016), 2009-11-23

**ONLINE APPENDIX – Supplemental Table and Figures**

**Supplemental Table 1.**

**qRT-PCR primer sequences used for the  
assessment of liver gene expression**

---

**F4/80**

for-ATGACCACACTTGCCATCCT  
rev-GGCGAGTCGCTTCTAAGACA

**CD68**

for-TGGA CT CAGCAGCTCTACCA  
rev-CCTGTGGGTGGTCGTAGG

**PPAR $\alpha$ ,**

for-AAGCCATCTTCACGATGCTG  
rev-TCAGAGGTCCTGAACAGTG

**CPT1,**

for-TATGTGAGGATGCTGCTTCC  
rev-CTCGGAGAGCTAAGCTTGTC

**MTTP**

for-GAACCTGAGAACCTGTCCAACG  
rev-TGAACTTGCTAAGGAGGGCTTG

**ACC1**

for-TGTCTATTCGGGGTGA CTTTCG  
rev-CCGTT CATTATCACCACGTAGG

**LCAD**

for-AAGGATTTAAGGGCAAGAAGC  
rev-GGAAGCGGAGGCGGAGTC

**DGAT2**

for-ATCTTCTCTGT CACCTGGCT  
rev-CCTTTCTTGGGCGTGTTC

**Supplement Figure 1. The effects of Kupffer cell depletion on basal hepatic glucose output (HGO) and insulin-stimulated glucose disposal rate (GDR) on a high fat or high sucrose diet.** Male Wistar rats depleted of Kupffer cells or control rats were exposed to a standard chow, high fat or high sucrose diet for two weeks. Subsequently, animals were fasted overnight and then underwent an infusion of [3-H<sup>3</sup>]-glucose and a subsequent hyperinsulinemic glucose clamp for the measurement of basal HGO (Panels A and C) and GDR (Panels B and D) as described in Research Design and Methods. Data are presented as mean±SE. n=a minimum of 4 in each group.

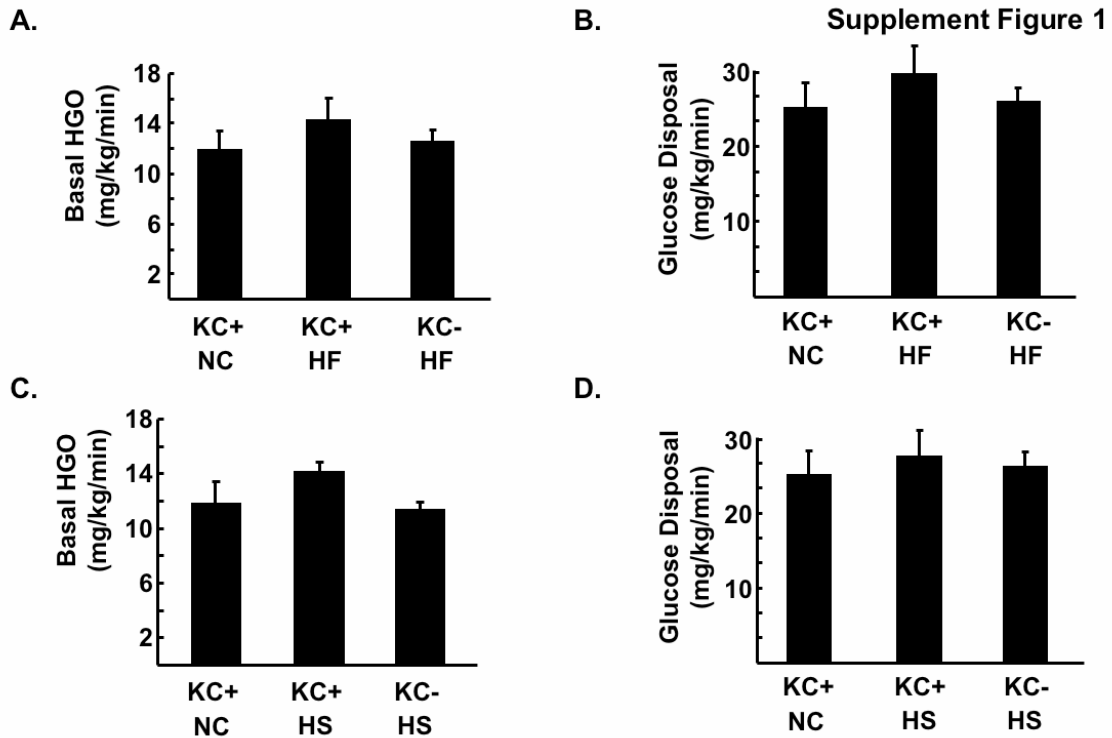

**Supplement Figure 2. Effects of diet on KC numbers and KC depletion in response to GdCl<sub>3</sub> in liver and adipose tissue.** Male Wistar rats were depleted of Kupffer cells by administration of GdCl<sub>3</sub> as described and then placed on a NC, HF, or HS diet. Subsequently, liver and adipose tissue were isolated and the presence of macrophages was determined by counting of CD68/ED1 positive cells after immunohistochemical staining of liver and adipose tissue sections. Statistical significance is indicated. n=a minimum of 4 in each group.

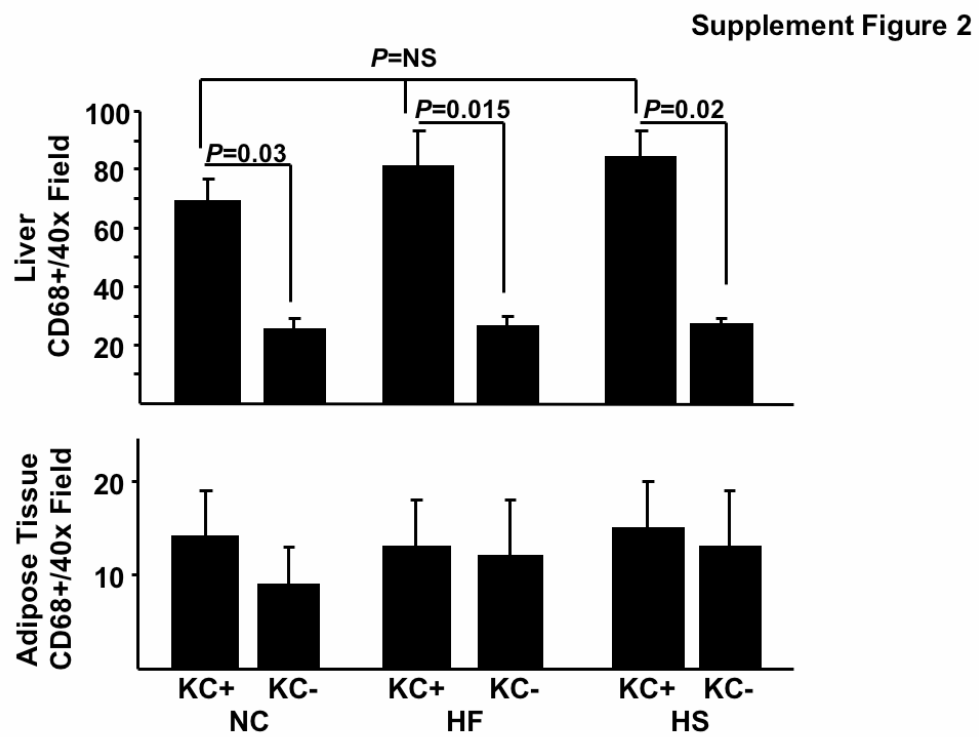

**Supplement Figure 3. The effects of GdCl<sub>3</sub> on lipid metabolism and the effects of KC on lipogenesis in primary hepatocytes. Panels A and B:** Primary hepatocytes exposed to 500ug/ml GdCl for 24h. The effects of this exposure on fatty acid oxidation and triglyceride levels was then assessed. n=a minimum of 3 in triplicate. **Panel C:** Primary hepatocytes were exposed to C<sup>14</sup>-acetate in the absence or presence of LPS and KC. After 24h incorporation of label into lipids was determined. n=a minimum of 3 in triplicate.

Supplement Figure 3

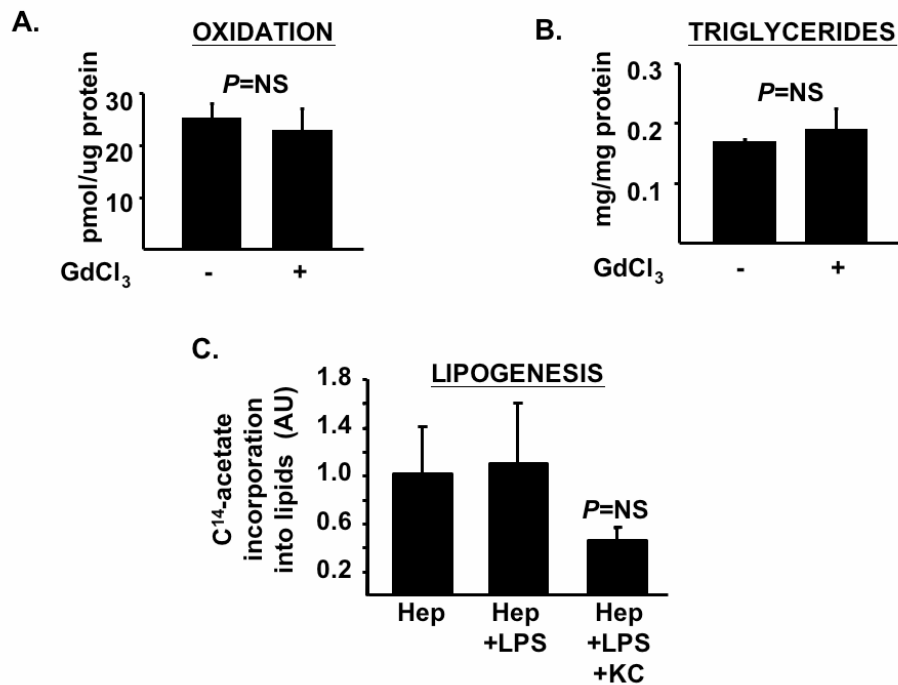

**Supplement Figure 4. Isolation and plating of Kupffer cells.** Kupffer cells were isolated from rat liver as described in Research Design and Methods. Subsequently, the cells were attached to a transwell insert. Attachment of Kupffer cells was confirmed by the assessment of CD68/ED1 positive cells after immunohistochemical staining as described in Research Design and Methods.

**Supplement Figure 4**

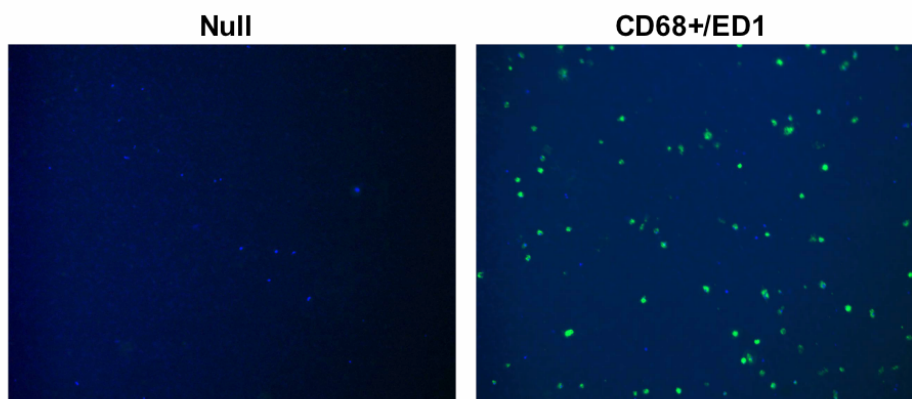

**Supplement Figure 5. KC TNF $\alpha$  expression in the liver of GdCl<sub>3</sub> treated rats on a on a high fat or high sucrose diet.** . Male Wistar rats depleted of Kupffer cells or control rats were exposed to a high sucrose (Top) or high fat (Bottom) diet for two weeks. Subsequently, the livers were isolated, sections were prepared, and immunofluorescent staining for Kupffer cells and TNF $\alpha$  was performed. The left panel shows CD68/ED1 positive cells (green), the center panels show TNF $\alpha$  positive cells (red), and the right panels show the merged images. In all panels Hoescht staining was used to visualize cell nuclei (blue). n=a minimum of 3.

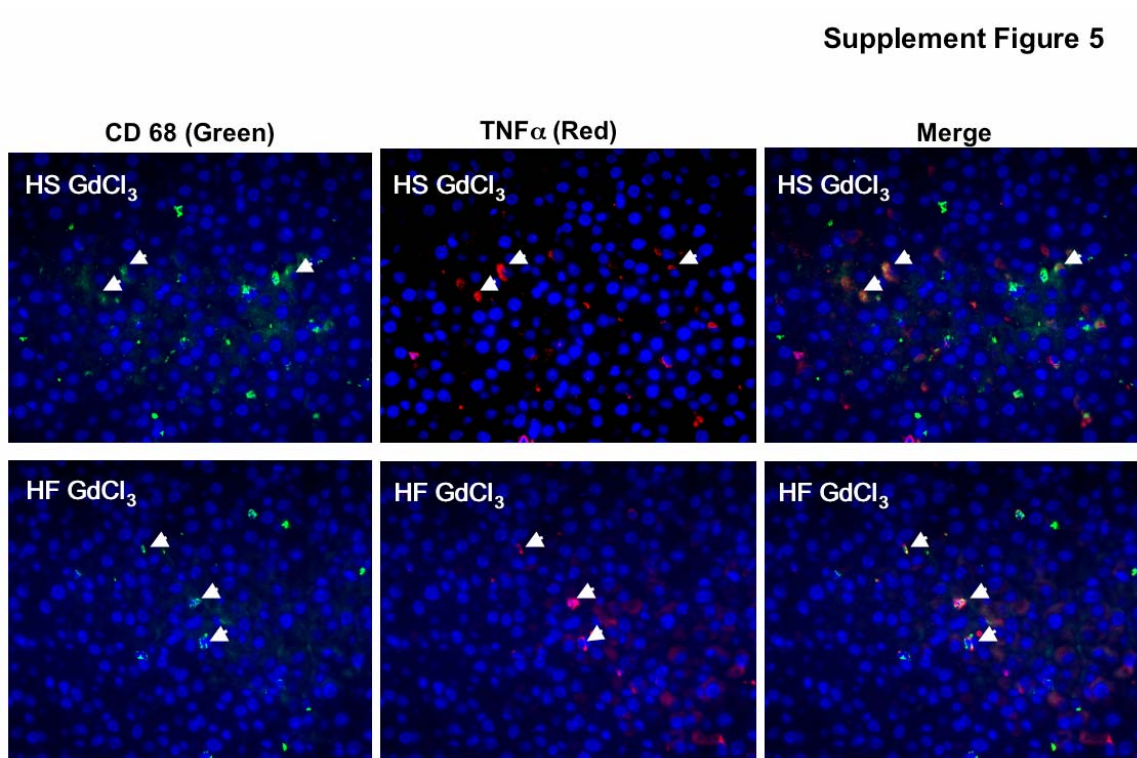

**Supplement Figure 6. The effects of saturated free fatty acids on Kupffer cell-induced alterations in hepatocyte lipid metabolism.** Hepatocytes and Kupffer cells were isolated from rat livers, plated and cultured in the presence of 0.4mM palmitate. Subsequently, the effects of the indicated exposures on fatty acid oxidation, fatty acid esterification and triglyceride levels (Panels A-C) were assessed. Data are presented as mean±SE. Statistical significance is indicated. n=a minimum of 6 in triplicate for each metabolic measurement.

Supplement Figure 6

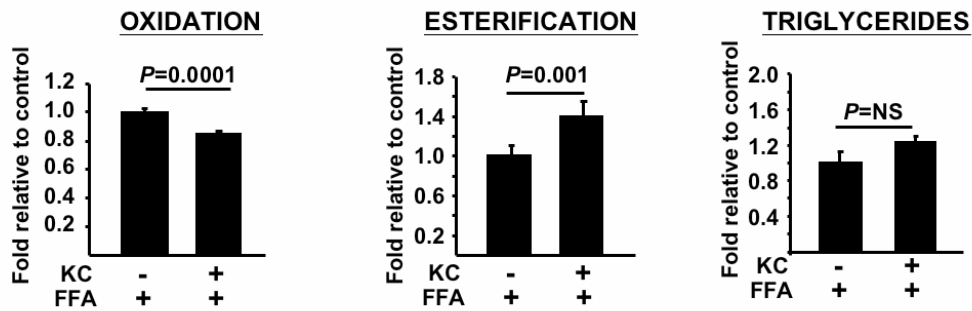

**Supplement Figure 7. The effects of depletion of a panel of cytokines on hepatocyte fatty acid oxidation.** Hepatocytes and Kupffer cells were isolated from rat livers, plated and cultured as described in Research Design and Methods. Subsequently, the effects of the indicated exposures in the absence or presence of a panel of cytokine neutralizing antibodies on fatty acid oxidation were assessed as described in Research Design and Methods. n=a minimum of 3 in triplicate for each experimental condition.

Supplement Figure 7

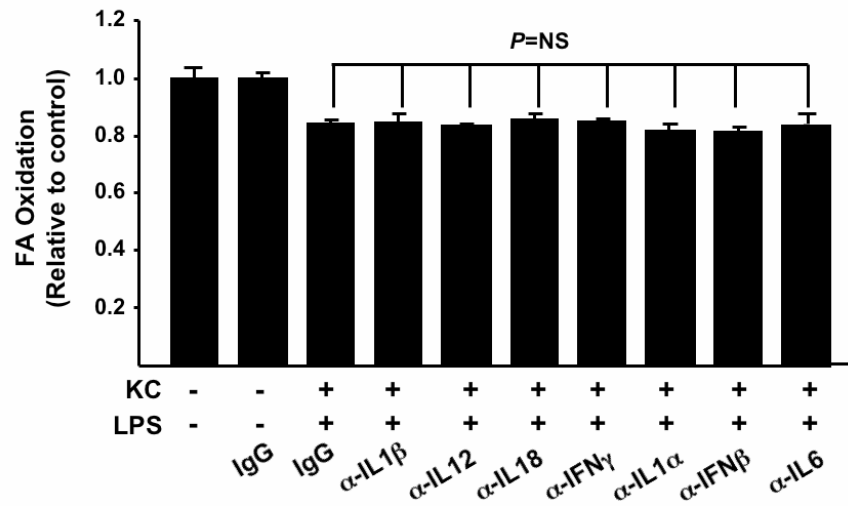

Supplement: supp_db09-0016_db09-0016_Online_Appendix.pdf [file supp_db09-0016_db09-0016_Online_Appendix.pdf]
